# Supplementary material for: Mutual polymorphic transformation of CsMgPO4·6H2O induced by solution pH
Source: Royal Society of Chemistry journal article supplement (doi:10.1039/d4ce01086h), 2024-12-16
Supplement: d4ce01086h1.pdf [file d4ce01086h1.pdf]

## Supporting Information

### Mutual polymorphic transformation of $\text{CsMgPO}_4 \cdot 6\text{H}_2\text{O}$ induced by solution pH

Sheng Lv, Liangcheng Song\*, Hongyan Cui, Yanling Xu, Chongqiang Zhu,  
Chunhui Yang

School of Chemistry and Chemical Engineering, Harbin Institute of Technology,  
Harbin 150001, People's Republic of China

---

\* To whom correspondence should be addressed.

E-mail: [lcsong@hit.edu.cn](mailto:lcsong@hit.edu.cn); Phone: +86-451-86403829; Fax: +86-451-86418270.

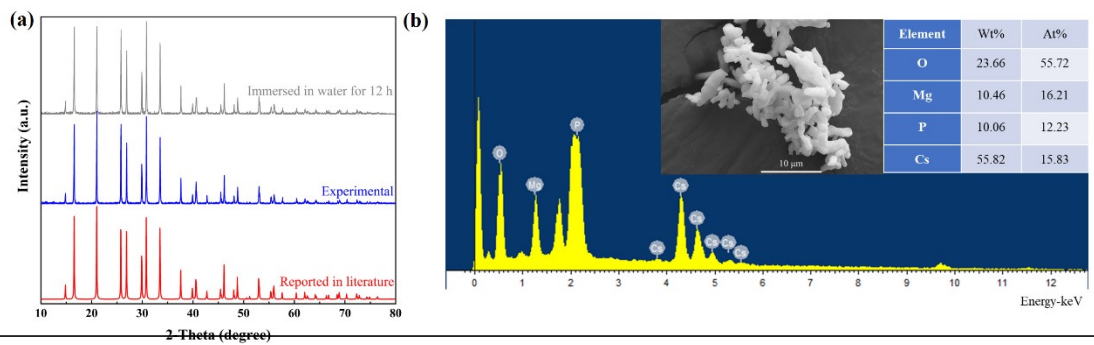

Figure S1. (a) Powder XRD patterns and (b) SEM/EDS images of the hexagonal form of  $\text{CsMgPO}_4 \cdot 6\text{H}_2\text{O}$ .

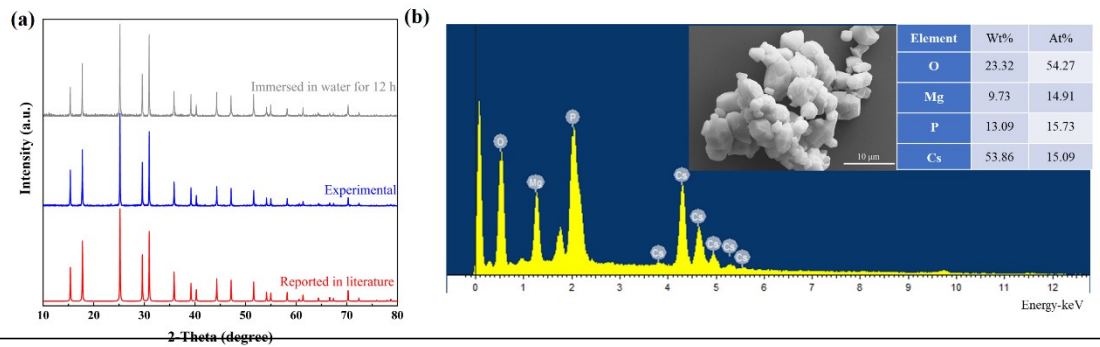

Figure S2. (a) Powder XRD patterns and (b) SEM/EDS images of the cubic form of  $\text{CsMgPO}_4 \cdot 6\text{H}_2\text{O}$ .

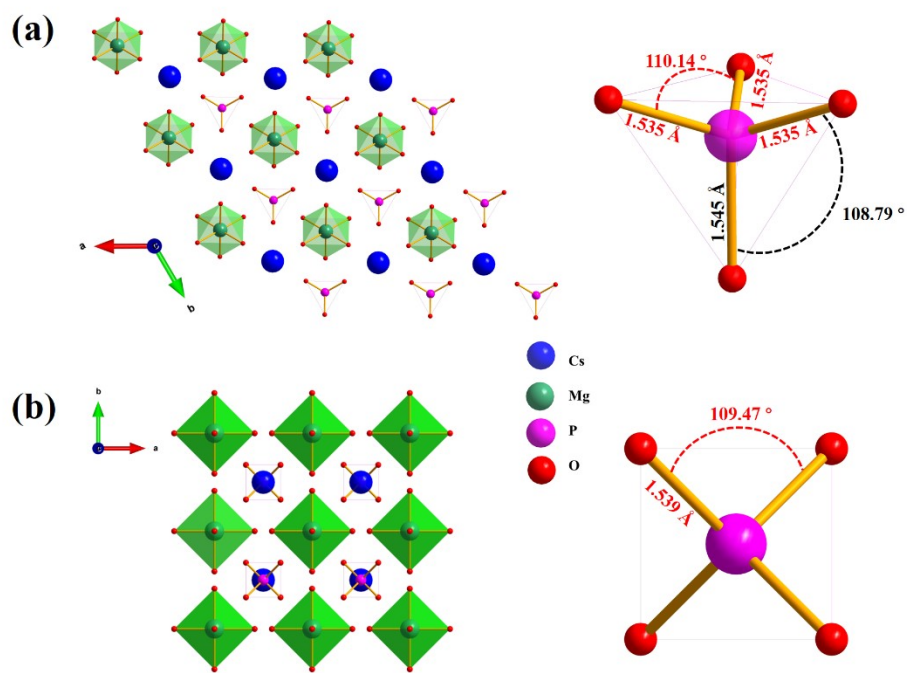

Figure S3. Structural information of the  $[\text{PO}_4]$  unit in (a) hexagonal form and (b) cubic form of  $\text{CsMgPO}_4 \cdot 6\text{H}_2\text{O}$
